# Supplementary material for: Retinoic acid inhibitors mitigate vision loss in a mouse model of retinal degeneration
Source: PubMed Central journal article supplement — Sci Adv. 2022 Mar 18;8(11):eabm4643. doi: 10.1126/sciadv.abm4643 (PMC8932665; doi:10.1126/sciadv.abm4643), 2022-03-18
Supplement: sciadv.abm4643_sm.pdf [file sciadv.abm4643_sm.pdf]

Supplementary Materials for  
**Retinoic acid inhibitors mitigate vision loss in a mouse model of  
retinal degeneration**

Michael Telias, Kevin K. Sit, Daniel Frozenfar, Benjamin Smith, Arjit Misra,  
Michael J. Goard\*, Richard H. Kramer\*

\*Corresponding author. Email: michael.goard@lifesci.ucsb.edu (M.J.G.); rhkramer@berkeley.edu (R.H.K.)

Published 18 March 2022, *Sci. Adv.* **8**, eabm4643 (2022)  
DOI: 10.1126/sciadv.abm4643

**The PDF file includes:**

Figs. S1 to S3  
Legends for tables S1 to S5

**Other Supplementary Material for this manuscript includes the following:**

Tables S1 to S5

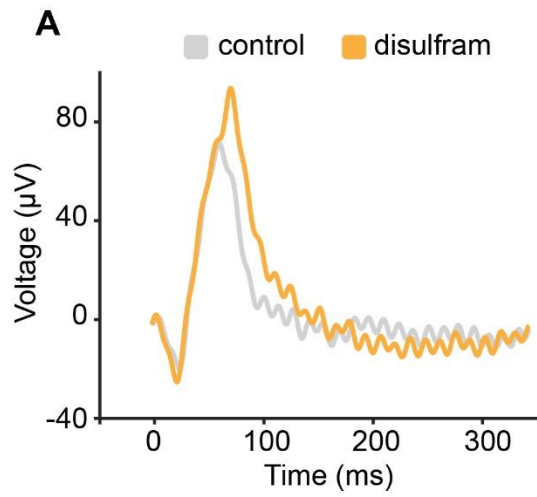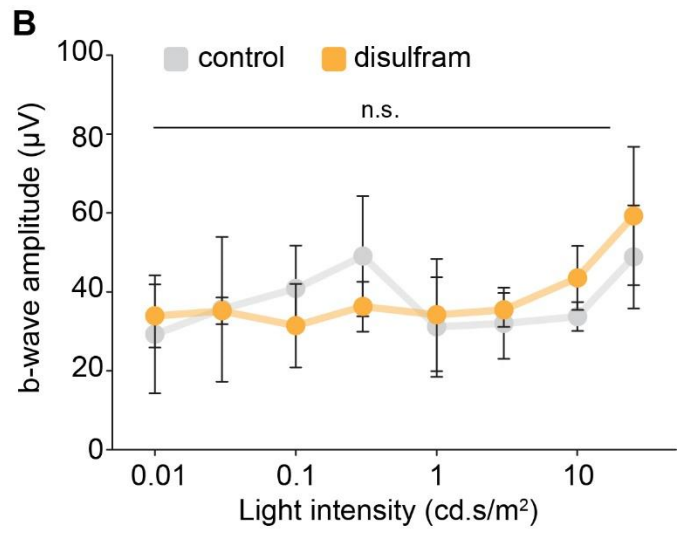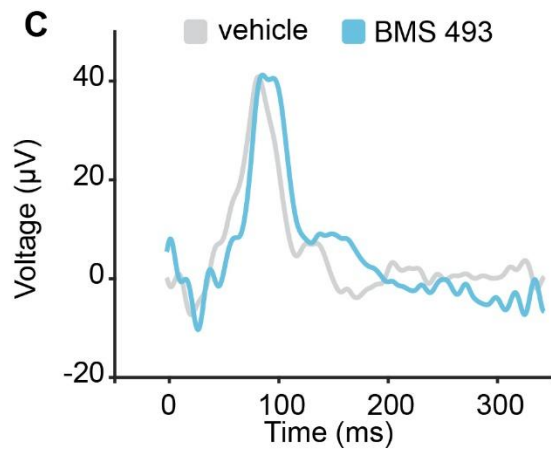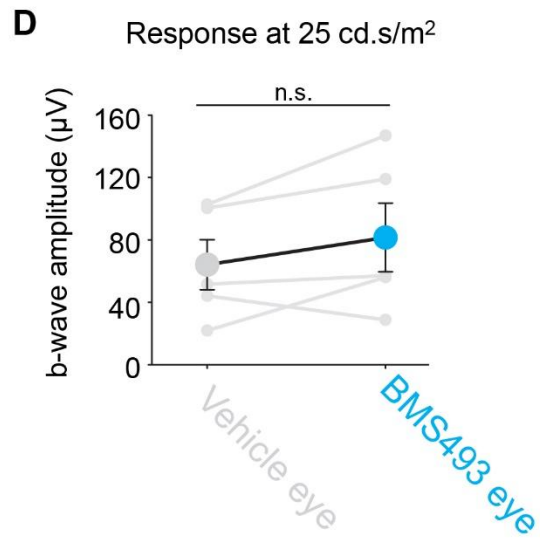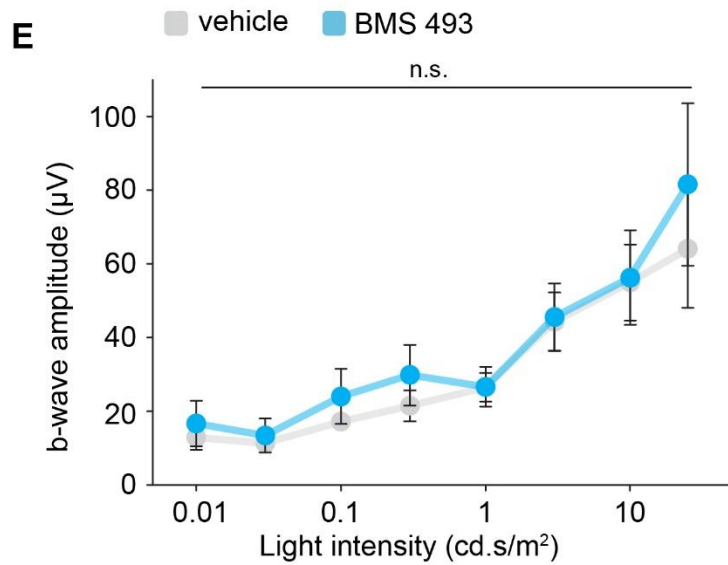

**Fig. S1. The ERG b-wave is unchanged by treatment with disulfiram or BMS 493.**

**A)** Electroretinogram (ERG) recordings of P80-90 rd10 mice treated for 40 days with disulfiram (orange) vs control (grey). Traces are the mean response to 32 flashes of light (25 cd.s/m<sup>2</sup> light for 20 msec) presented at a frequency of 2 Hz. **B)** Intensity-response curves showing no significant effect of disulfiram. The amplitude of the b-wave was measured from the peak of the first inward voltage deflection (a-wave) to the peak of the first outward voltage deflection. Recordings were obtained from 3 control mice (6 eyes) and 4 disulfiram mice (8 eyes) and are shown as mean ± SEM. n.s. - non-significant difference, p>0.05, 2-tailed t-test (**Table S3**). **C)** ERG recordings 4-6 days after injecting vehicle (PBS x1, grey) into one eye and BMS 493 (blue) into the contralateral eye. **D)** Responses from BMS 493-injected and vehicle-injected eyes in all 5 mice tested. **E)** Intensity-response curves showing no significant effect of BMS 493. Recordings were obtained from 5 mice (10 eyes), one eye injected with BMS 493 and the contralateral eye with vehicle. Injections were randomized across eyes and mice. n.s. - non-significant difference, p>0.05, 2-tailed paired t-test (**Table S3**).

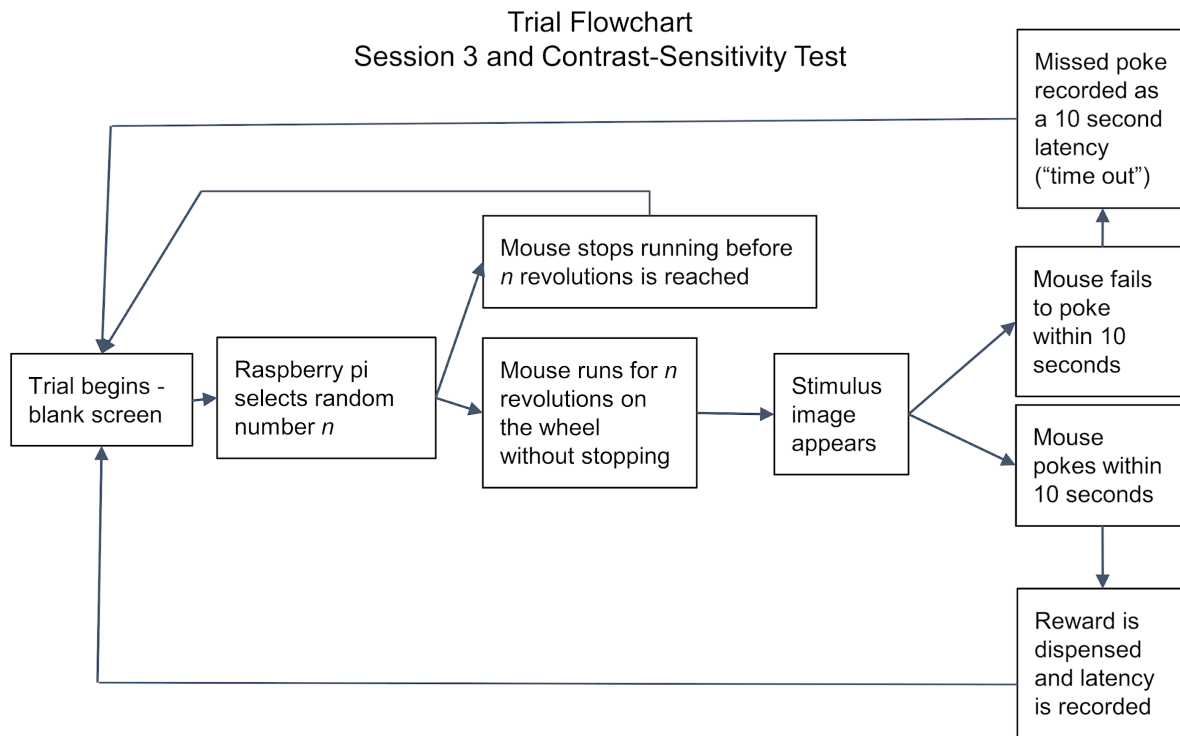

**Fig. S2. Parameters defining a single trial in a trained mouse.**

During session 3 and contrast sensitivity test (**Fig. 3B-C**), the stimulus is displayed for a maximum of 10 seconds after it is triggered by wheel revolutions. Each trial begins with a blank screen displaying a 0% contrast version of the stimulus image ('blank screen'). The computer (i.e.: raspberry pi) chooses a random number of wheel revolutions (see **Table S4**) necessary to display the stimulus image. Stimulus image is always 100% contrast in sessions 1-3, or 1 out of 9 different contrasts, randomly chosen, during contrast sensitivity test. The response of the mouse (i.e. nose poke) is registered, and the delivery of reward is activated if the mouse pokes before "time out" (10 seconds for training session 3 and contrast sensitivity test, see **Table S4**).

Type or paste caption here. Create a page break and paste in the Figure above the caption.

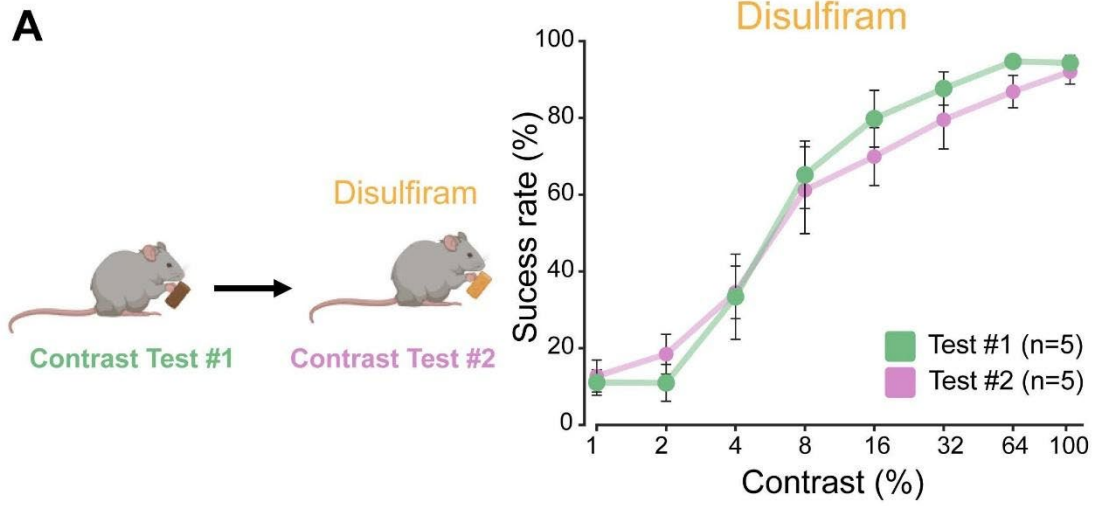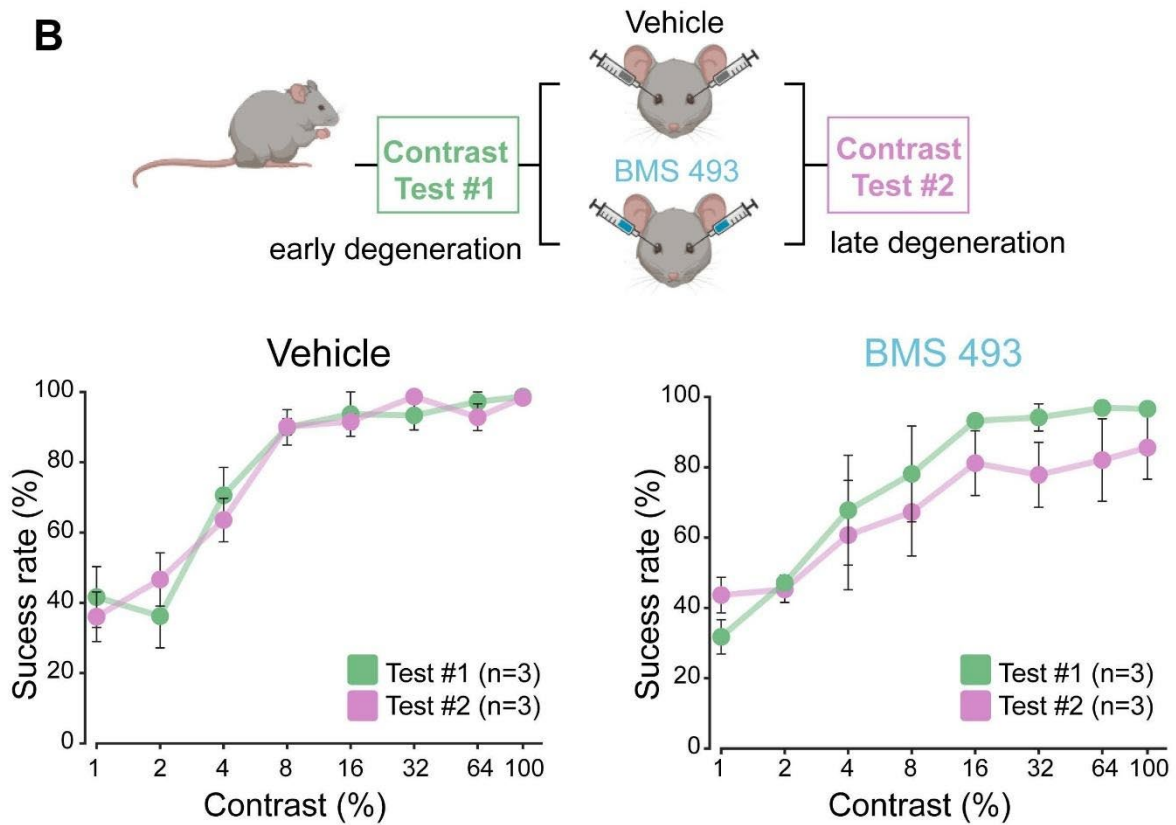

**Fig. S3. Testing disulfiram and BMS 493 in wild-type mice with normal vision.**

**A)** Left: experimental design. C57/Black male mice were trained and tested at ~P60, using the same behavioral paradigm as shown in **Fig. 3A-C**. Mice were fed a regular diet without disulfiram and tested for contrast sensitivity (test #1), after which their food was switched to that containing disulfiram (2 mg/Kg) for 40 days. At ~P100 they were tested for the second time (test #2). Right: success rate for each contrast tested before (green) and after (pink) disulfiram treatment. Values are shown as mean  $\pm$  SEM,  $p > 0.05$  in all contrasts, Mann-Whitney test. **B)** Similar to **A**, above. Six C57/Black male mice were trained and tested at P60, and then injected intravitreally in both eyes with 1  $\mu$ l of vehicle (PBS x1) or BMS 493 (5  $\mu$ M). At 4-6 days post-injection, they were tested for a second time. The success rate in test #1 was not significantly different from the success rate during test #2 in either of the two groups. Values are shown as mean  $\pm$  SEM,  $p > 0.05$  in all contrasts, Mann-Whitney test. Type or paste caption here. Create a page break and paste in the Figure above the caption.

**TABLE S1**      **Corresponds to Figure 2**

| <u>Change in # active units per retina</u> |         |            |       | <u>Change in # active units per retina</u> |      |      |       |
|--------------------------------------------|---------|------------|-------|--------------------------------------------|------|------|-------|
|                                            | control | disulfiram |       | vehicle                                    | BMS  |      |       |
| # active units                             | 568     | 443        |       | 271                                        | 135  |      |       |
| pieces of retina                           | 11      | 10         |       | 7                                          | 6    |      |       |
| mean # of units                            | 51.6    | 44.3       |       | 38.7                                       | 22.5 |      |       |
|                                            |         |            | Delta |                                            |      |      | Delta |
| normalized                                 |         |            |       |                                            |      |      |       |
| %                                          | 100     | 85.8       | 14.2  | 100                                        | 58.1 | 41.9 |       |

**Table S1. Data on number of active units in MEA recordings (corresponds to Figure 2).**

Individual data points for mean firing frequency (**Fig. 2C**), and cumulative probability plot (**Fig. 2D**) in control and disulfiram-treated mice, as well as in vehicle and BMS 493-injected mice (**Fig. 2G,H**). In addition the table provides the data for the total and relative number of active units in retinas in all four conditions. Data obtained using ex-vivo MEA recordings in ACSF (see **Materials and Methods**).

**TABLE S2 Supplemental Figure 1: ERG in Control vs. Oxaliplatin, BMS 493 / Vehicle injected rd10 mice**

(All data passed Normality Test Shapiro-Wilk)

**Fig. S1B Control - In-wave Amplitude (µV)**

| Light Intensity (cd.s/m <sup>2</sup> ) | Mouse 1 |       | Mouse 2 |       | Mouse 3 |       | Mouse 4 |       | Light Intensity (cd.s/m <sup>2</sup> ) | Mouse 1 |       | Mouse 2 |       | Mouse 3 |         | Mouse 4 |       | In-wave Amplitude (µV) | 2-tailed t-test p-value |      |      |       |      |      |       |      |       |       |       |       |       |       |            |            |
|----------------------------------------|---------|-------|---------|-------|---------|-------|---------|-------|----------------------------------------|---------|-------|---------|-------|---------|---------|---------|-------|------------------------|-------------------------|------|------|-------|------|------|-------|------|-------|-------|-------|-------|-------|-------|------------|------------|
|                                        | Eye 1   | Eye 2 |                                        | Eye 1   | Eye 2 | Eye 1   | Eye 2 | Eye 1   | Eye 2   | Eye 1   | Eye 2 |                        |                         |      |      |       |      |      |       |      |       |       |       |       |       |       |            |            |
| 0.01                                   | 40      | 48.3  | 54.3    | 4.8   | 0.8     | 2.9   | 30      | 21.0  | 30.95                                  | 0.01    | 54.51 | 2.91    | 30.95 | 19.1011 | 14.1120 | 0.01    | 39.81 | 26.1*                  | 40                      | 34.4 | 17.1 | 29.79 | 10.3 | 33.6 | 8.1   | 98.1 | 58.1  | 0.01  | 40    | 29.79 | 16.6  | 19.1  | 0.00121640 |            |
| 0.03                                   | 59.7    | 51.1  | 71.9    | 7.1   | 18.5    | 11    | 21      | 22.7  | 21.85                                  | 0.03    | 71.9  | 11      | 21.85 | 18.1011 | 18.1172 | 0.03    | 21    | 62.7*                  | 43.85                   | 25.7 | 29.7 | 24.9  | 47.1 | 36   | 5.1   | 69.1 | 37.1  | 0.03  | 43.85 | 7.7   | 36    | 37.1  | 0.00042218 |            |
| 0.1                                    | 69.9    | 48.7  | 78.9    | 1.9   | 39.8    | 31.9  | 41      | 41.95 | 41.95                                  | 0.1     | 59.3  | 21.95   | 41.95 | 41.95   | 41.95   | 0.1     | 41.4  | 40.9*                  | 60.95                   | 4    | 13.1 | 13.9  | 18.1 | 44.2 | 11.9  | 20.1 | 20.1  | 0.1   | 60.95 | 11.9  | 19.9  | 20.1  | 0.00000004 |            |
| 0.3                                    | 86.4    | 71.1  | 78.79   | 54.2  | 42.4    | 28.1  | 27.1    | 52.4  | 39.95                                  | 0.3     | 78.79 | 28.1    | 39.95 | 39.95   | 39.95   | 0.3     | 52.5  | 54.6*                  | 54.55                   | 39.2 | 14.5 | 26.85 | 33.1 | 17.1 | 19.2  | 6.5  | 50    | 28.25 | 0.3   | 54.55 | 26.85 | 19.2  | 28.25      | 0.00000084 |
| 1                                      | 44.9    | 63.7  | 14.3    | 13.9  | 5.8     | 10.8  | 12.4    | 43.8  | 28.1                                   | 1       | 54.1  | 10.8    | 28.1  | 28.1    | 28.1    | 1       | 41.5  | 88.9*                  | 71.9                    | 24.1 | 11.5 | 17.8  | 4.8  | 18.6 | 12.2  | 6.5  | 54.4  | 16.49 | 1     | 71.9  | 17.8  | 12.2  | 16.49      | 0.00000095 |
| 3                                      | 29.7    | 69.2  | 49.45   | 17.1  | 21.6    | 19.45 | 27.1    | 27.1  | 27.1                                   | 3       | 49.45 | 19.45   | 27.1  | 27.1    | 27.1    | 3       | 52.2  | 41.9*                  | 28.55                   | 11.5 | 23.1 | 27.4  | 28.7 | 16.2 | 42.45 | 24.3 | 42    | 43.15 | 3     | 28.55 | 27.4  | 42.45 | 43.15      | 0.00000619 |
| 10                                     | 23.2    | 46.2  | 34.85   | 22.8  | 11      | 26.9  | 13.9    | 46    | 39.45                                  | 10      | 34.85 | 26.9    | 39.45 | 39.45   | 39.45   | 10      | 0.5   | 0.1*                   | 36.1                    | 39.3 | 20.7 | 40    | 29.6 | 14.7 | 30.85 | 53.8 | 81.1  | 67.15 | 10    | 36.1  | 40    | 30.85 | 67.15      | 0.01104009 |
| 25                                     | 45.9    | 63.1  | 54.55   | 13.3  | 14.5    | 23.1  | 69.1    | 66.1  | 66                                     | 25      | 54.55 | 23.1    | 66    | 66      | 66      | 25      | 10.8  | 14.8*                  | 48.1                    | 20.1 | 30.4 | 15.25 | 61   | 35.2 | 78.6  | 67.8 | 113.1 | 104.8 | 25    | 48.1  | 15.25 | 78.6  | 104.8      | 0.04110007 |

**Fig. S1D BMS 493 - In-wave Amplitude (µV)**

| Light Intensity (cd.s/m <sup>2</sup> ) | Mouse 1 |       | Mouse 2 |       | Mouse 3 |       | Mouse 4 |       | Light Intensity (cd.s/m <sup>2</sup> ) | Mouse 1 |       | Mouse 2 |       | Mouse 3 |       | Mouse 4 |       | In-wave Amplitude (µV) | 2-tailed t-test p-value |      |      |      |       |      |       |       |      |      |      |      |      |            |      |            |            |
|----------------------------------------|---------|-------|---------|-------|---------|-------|---------|-------|----------------------------------------|---------|-------|---------|-------|---------|-------|---------|-------|------------------------|-------------------------|------|------|------|-------|------|-------|-------|------|------|------|------|------|------------|------|------------|------------|
|                                        | Eye 1   | Eye 2 |                                        | Eye 1   | Eye 2 |                        |                         |      |      |      |       |      |       |       |      |      |      |      |      |            |      |            |            |
| 0.01                                   | 41      | 6.1   | 12.2    | 15.6  | 6.7     | 12.4  | 10.4    | 10.5  | 10.2                                   | 0.01    | 11.1  | 17.1    | 6.1   | 10.5    | 11.6  | 4.1     | 15.4  | 12.8                   | 10.4                    | 40.2 | 0.01 | 10.4 | 15.4  | 12.8 | 10.4  | 11.1  | 0.01 | 10.4 | 15.4 | 12.8 | 10.4 | 0.00000001 |      |            |            |
| 0.03                                   | 10      | 16.2  | 10.4    | 4     | 11.6    | 10.5  | 10.4    | 6.6   | 11.1                                   | 0.03    | 11.1  | 17.1    | 6.1   | 10.5    | 11.6  | 4.1     | 15.4  | 12.8                   | 10.4                    | 11.1 | 0.03 | 11.1 | 17.1  | 6.1  | 10.5  | 11.6  | 4.1  | 15.4 | 12.8 | 10.4 | 11.1 | 0.00000001 |      |            |            |
| 0.1                                    | 15.5    | 15.2  | 18      | 7.8   | 11      | 10.9  | 11.4    | 20    | 17                                     | 0.1     | 11.1  | 17.1    | 6.1   | 10.5    | 11.6  | 4.1     | 15.4  | 12.8                   | 10.4                    | 11.1 | 0.1  | 11.1 | 17.1  | 6.1  | 10.5  | 11.6  | 4.1  | 15.4 | 12.8 | 10.4 | 11.1 | 0.00000001 |      |            |            |
| 0.3                                    | 23.8    | 20.2  | 16      | 16.9  | 32      | 41    | 12.8    | 9.3   | 16.5                                   | 0.3     | 21.4  | 17.1    | 6.1   | 10.5    | 11.6  | 4.1     | 15.4  | 12.8                   | 10.4                    | 11.1 | 0.3  | 21.4 | 17.1  | 6.1  | 10.5  | 11.6  | 4.1  | 15.4 | 12.8 | 10.4 | 11.1 | 0.00000001 |      |            |            |
| 1                                      | 14.5    | 24.1  | 19.5    | 41.7  | 26.4    | 30.9  | 18.7    | 13.2  | 16.4                                   | 1       | 15.2  | 17.1    | 6.1   | 10.5    | 11.6  | 4.1     | 15.4  | 12.8                   | 10.4                    | 11.1 | 1    | 15.2 | 17.1  | 6.1  | 10.5  | 11.6  | 4.1  | 15.4 | 12.8 | 10.4 | 11.1 | 0.00000001 |      |            |            |
| 3                                      | 19.7    | 43.8  | 71.1    | 73.2  | 47.1    | 36.9  | 40.7    | 27.8  | 33.1                                   | 3       | 43.8  | 71.1    | 73.2  | 47.1    | 36.9  | 40.7    | 27.8  | 33.1                   | 33.1                    | 3    | 43.8 | 71.1 | 73.2  | 47.1 | 36.9  | 40.7  | 27.8 | 33.1 | 33.1 | 3    | 43.8 | 71.1       | 73.2 | 47.1       | 0.00000001 |
| 10                                     | 16.1    | 35.4  | 18.7    | 19.7  | 79.8    | 68.2  | 37.5    | 48.1  | 16.1                                   | 10      | 16.1  | 35.4    | 18.7  | 19.7    | 79.8  | 68.2    | 37.5  | 48.1                   | 16.1                    | 10   | 16.1 | 35.4 | 18.7  | 19.7 | 79.8  | 68.2  | 37.5 | 48.1 | 16.1 | 10   | 16.1 | 35.4       | 18.7 | 0.00000001 |            |
| 25                                     | 28.7    | 44.2  | 100.1   | 119   | 102.6   | 146.9 | 57.1    | 51.6  | 56                                     | 25      | 44.2  | 100.1   | 119   | 102.6   | 146.9 | 57.1    | 51.6  | 56                     | 25                      | 25   | 25   | 44.2 | 100.1 | 119  | 102.6 | 146.9 | 57.1 | 51.6 | 56   | 25   | 25   | 25         | 44.2 | 100.1      | 0.00000001 |

**Fig. S1D.E Vehicle - In-wave Amplitude (µV)**

| Light Intensity (cd.s/m <sup>2</sup> ) | Mouse 1 |       | Mouse 2 |       | Mouse 3 |       | Mouse 4 |       | Mouse 5 |       | Vehicle |       | Light Intensity (cd.s/m <sup>2</sup> ) | BMS 493 |       | Vehicle |       | In-wave Amplitude (µV) | 2-tailed t-test p-value |      |      |      |       |      |       |       |      |      |      |      |      |            |            |            |            |
|----------------------------------------|---------|-------|---------|-------|---------|-------|---------|-------|---------|-------|---------|-------|----------------------------------------|---------|-------|---------|-------|------------------------|-------------------------|------|------|------|-------|------|-------|-------|------|------|------|------|------|------------|------------|------------|------------|
|                                        | Eye 1   | Eye 2 |                                        | Eye 1   | Eye 2 | Eye 1   | Eye 2 |                        |                         |      |      |      |       |      |       |       |      |      |      |      |      |            |            |            |            |
| 0.01                                   | 41      | 6.1   | 12.2    | 15.6  | 6.7     | 12.4  | 10.4    | 10.5  | 10.2    | 0.01  | 11.1    | 17.1  | 6.1                                    | 10.5    | 11.6  | 4.1     | 15.4  | 12.8                   | 10.4                    | 40.2 | 0.01 | 10.4 | 15.4  | 12.8 | 10.4  | 11.1  | 0.01 | 10.4 | 15.4 | 12.8 | 10.4 | 11.1       | 0.00000001 |            |            |
| 0.03                                   | 10      | 16.2  | 10.4    | 4     | 11.6    | 10.5  | 10.4    | 6.6   | 11.1    | 0.03  | 11.1    | 17.1  | 6.1                                    | 10.5    | 11.6  | 4.1     | 15.4  | 12.8                   | 10.4                    | 11.1 | 0.03 | 11.1 | 17.1  | 6.1  | 10.5  | 11.6  | 4.1  | 15.4 | 12.8 | 10.4 | 11.1 | 0.00000001 |            |            |            |
| 0.1                                    | 15.5    | 15.2  | 18      | 7.8   | 11      | 10.9  | 11.4    | 20    | 17      | 0.1   | 11.1    | 17.1  | 6.1                                    | 10.5    | 11.6  | 4.1     | 15.4  | 12.8                   | 10.4                    | 11.1 | 0.1  | 11.1 | 17.1  | 6.1  | 10.5  | 11.6  | 4.1  | 15.4 | 12.8 | 10.4 | 11.1 | 0.00000001 |            |            |            |
| 0.3                                    | 23.8    | 20.2  | 16      | 16.9  | 32      | 41    | 12.8    | 9.3   | 16.5    | 0.3   | 21.4    | 17.1  | 6.1                                    | 10.5    | 11.6  | 4.1     | 15.4  | 12.8                   | 10.4                    | 11.1 | 0.3  | 21.4 | 17.1  | 6.1  | 10.5  | 11.6  | 4.1  | 15.4 | 12.8 | 10.4 | 11.1 | 0.00000001 |            |            |            |
| 1                                      | 14.5    | 24.1  | 19.5    | 41.7  | 26.4    | 30.9  | 18.7    | 13.2  | 16.4    | 1     | 15.2    | 17.1  | 6.1                                    | 10.5    | 11.6  | 4.1     | 15.4  | 12.8                   | 10.4                    | 11.1 | 1    | 15.2 | 17.1  | 6.1  | 10.5  | 11.6  | 4.1  | 15.4 | 12.8 | 10.4 | 11.1 | 0.00000001 |            |            |            |
| 3                                      | 19.7    | 43.8  | 71.1    | 73.2  | 47.1    | 36.9  | 40.7    | 27.8  | 33.1    | 3     | 43.8    | 71.1  | 73.2                                   | 47.1    | 36.9  | 40.7    | 27.8  | 33.1                   | 33.1                    | 3    | 43.8 | 71.1 | 73.2  | 47.1 | 36.9  | 40.7  | 27.8 | 33.1 | 33.1 | 3    | 43.8 | 71.1       | 73.2       | 47.1       | 0.00000001 |
| 10                                     | 16.1    | 35.4  | 18.7    | 19.7  | 79.8    | 68.2  | 37.5    | 48.1  | 16.1    | 10    | 16.1    | 35.4  | 18.7                                   | 19.7    | 79.8  | 68.2    | 37.5  | 48.1                   | 16.1                    | 10   | 16.1 | 35.4 | 18.7  | 19.7 | 79.8  | 68.2  | 37.5 | 48.1 | 16.1 | 10   | 16.1 | 35.4       | 18.7       | 0.00000001 |            |
| 25                                     | 28.7    | 44.2  | 100.1   | 119   | 102.6   | 146.9 | 57.1    | 51.6  | 56      | 25    | 44.2    | 100.1 | 119                                    | 102.6   | 146.9 | 57.1    | 51.6  | 56                     | 25                      | 25   | 25   | 44.2 | 100.1 | 119  | 102.6 | 146.9 | 57.1 | 51.6 | 56   | 25   | 25   | 25         | 44.2       | 100.1      | 0.00000001 |

**Table S2. Data and statistical analysis for Supplemental Figure 1.**

Individual data points and statistical analysis for the b-wave's amplitude (in µV), used for the plots shown in Fig. S1B,D,E). Data obtained using in-vivo ERG recordings of anesthetized mice (see Materials and Methods).



**TABLE S3** **Corresponds to Figure 3B-C** Parameters of training and testing protocols in the behavioral paradigm

| Protocol                  | Required Wheel Revolutions | Reward Pump Duration | Maximum Rest | Reward Availability | Blank Image | Stimulus Images                  |
|---------------------------|----------------------------|----------------------|--------------|---------------------|-------------|----------------------------------|
| Habituation               | None                       | 3 seconds            | None         | Constant            | None        | 100% contrast                    |
| Session 1                 | 25                         | 3 seconds            | None         | Until poke          | 0% contrast | 100% contrast                    |
| Session 2                 | 25                         | 1 second             | 10 seconds   | 30 seconds          | 0% contrast | 100% contrast                    |
| Session 3                 | 10 - 50                    | 1 second             | 10 seconds   | 10 seconds          | 0% contrast | 100% contrast                    |
| Contrast Sensitivity Test | 10 - 25                    | 1 second             | 5 seconds    | 10 seconds          | 0% contrast | 0,1,2,4,8,16,32,64,100% contrast |

**Table S3. Parameters of training and testing protocols in the behavioral paradigm (corresponds to Figure 3).**

Detailed description of the parameters employed during each protocol for habituation, training and testing, in the mouse behavioral paradigm (**Fig. 3B,C**). Each protocol lasted 12 hours from 6 PM to 6 AM. Protocols were encoded in python and manually loaded onto each raspberry pie using signature dongles, each corresponding to a specific cage.

| TABLE S4 Figure 4 - Visual Behavior Disulfiram Treatment                   |          |                           |                                                               |          |                           |                  |                |                  |                      |         |        |
|----------------------------------------------------------------------------|----------|---------------------------|---------------------------------------------------------------|----------|---------------------------|------------------|----------------|------------------|----------------------|---------|--------|
| <b>Fig 4D</b>                                                              |          |                           |                                                               |          |                           |                  |                |                  |                      |         |        |
| <b>Success Rate</b>                                                        |          |                           |                                                               |          |                           |                  |                |                  |                      |         |        |
| <b>TEST 1</b>                                                              |          |                           | <b>TEST 1</b> *** Before any treatment was given to any mouse |          |                           |                  |                |                  |                      |         |        |
| All mice n = 13                                                            |          |                           | Control (n=7)                                                 |          |                           | Disulfiram (n=6) |                |                  | Mann-Whitney U Test  |         |        |
| Contrast %                                                                 | mean     | sem                       | mean                                                          | sem      | mean                      | sem              | mean           | sem              | U value              | P value |        |
| 8                                                                          | 22.77    | 4.78                      | 19.98                                                         | 4.86     | 26.02                     | 9.06             | 21.00          | <b>P = 0.998</b> |                      |         |        |
| 16                                                                         | 35.00    | 7.74                      | 28.97                                                         | 6.89     | 42.02                     | 15.05            | 20.00          | <b>P = 0.156</b> |                      |         |        |
| 32                                                                         | 57.31    | 6.46                      | 47.18                                                         | 6.88     | 69.13                     | 9.94             | 10.00          | <b>P = 0.486</b> |                      |         |        |
| 64                                                                         | 85.62    | 3.83                      | 82.26                                                         | 6.12     | 89.54                     | 4.25             | 15.00          | <b>P = 0.163</b> |                      |         |        |
| 100                                                                        | 93.90    | 1.02                      | 94.08                                                         | 1.69     | 93.69                     | 1.17             | 19.00          | <b>P = 0.186</b> |                      |         |        |
| <b>Fig 4E</b>                                                              |          |                           |                                                               |          |                           |                  |                |                  |                      |         |        |
| <b>Success Rate</b>                                                        |          |                           |                                                               |          |                           |                  |                |                  |                      |         |        |
| <b>TEST 2</b>                                                              |          |                           | Control (n=7)                                                 |          |                           | Disulfiram (n=6) |                |                  | Mann-Whitney U Test  |         | T-Test |
| Contrast %                                                                 | mean     | sem                       | mean                                                          | sem      | U value                   | P value          | Normality Test | t                | P value              |         |        |
| 8                                                                          | 16.18    | 3.78                      | 18.86                                                         | 5.66     | 19.0                      | <b>P = 0.836</b> |                |                  |                      |         |        |
| 16                                                                         | 20.69    | 4.95                      | 31.09                                                         | 13.50    | 18.50                     | <b>P = 0.731</b> |                |                  |                      |         |        |
| 32                                                                         | 23.83    | 4.56                      | 50.75                                                         | 13.52    | 10.00                     | <b>P = 0.138</b> | Passed         | -2.012           | <b>P = 0.0535</b>    |         |        |
| 64                                                                         | 26.26    | 6.37                      | 76.65                                                         | 8.28     | 2.00                      | <b>P = 0.005</b> | Passed         | 4.901            | <b>P = &lt;0.001</b> |         |        |
| 100                                                                        | 31.33    | 7.93                      | 81.69                                                         | 6.72     | 1.00                      | <b>P = 0.002</b> | Passed         | -4.75            | <b>P = &lt;0.001</b> |         |        |
| <b>Inclusion and exclusion of mice in Control / Disulfiram experiments</b> |          |                           |                                                               |          |                           |                  |                |                  |                      |         |        |
| Control Mice                                                               | Status   | Reason                    | Disulfiram                                                    | Status   | Reason                    |                  |                |                  |                      |         |        |
| RD10-N2                                                                    | included | ratio SD/mean = 0.3       | RD10-N1                                                       | included | ratio SD/mean = 0.3       |                  |                |                  |                      |         |        |
| RD10-N4                                                                    | excluded | <80% success Session 3    | RD10-N3                                                       | included | ratio SD/mean > 0.4       |                  |                |                  |                      |         |        |
| RD10-N6                                                                    | included | ratio SD/mean = 0.2       | RD10-N5                                                       | excluded | did not perform on Test 2 |                  |                |                  |                      |         |        |
| RD10-P1                                                                    | included | ratio SD/mean = 0.3       | RD10-P2                                                       | excluded | ratio SD/mean > 0.4       |                  |                |                  |                      |         |        |
| RD10-P3                                                                    | included | ratio SD/mean = 0.35      | RD10-P4                                                       | excluded | ratio SD/mean > 0.4       |                  |                |                  |                      |         |        |
| RD10-P5                                                                    | included | ratio SD/mean = 0.2       | RD10-P6                                                       | included | ratio SD/mean = 0.2       |                  |                |                  |                      |         |        |
| RD10-S2                                                                    | included | ratio SD/mean = 0.15      | RD10-S1                                                       | excluded | ratio SD/mean > 0.4       |                  |                |                  |                      |         |        |
| RD10-S4                                                                    | excluded | did not perform on Test 2 | RD10-S3                                                       | included | ratio SD/mean = 0.2       |                  |                |                  |                      |         |        |
| RD10-S6                                                                    | included | ratio SD/mean = 0.3       | RD10-S5                                                       | excluded | <80% success Session 3    |                  |                |                  |                      |         |        |
| RD10-T1                                                                    | excluded | ratio SD/mean > 0.4       | RD10-T2                                                       | included | ratio SD/mean = 0.35      |                  |                |                  |                      |         |        |
| RD10-T3                                                                    | excluded | did not perform on Test 2 | RD10-T4                                                       | excluded | ratio SD/mean > 0.4       |                  |                |                  |                      |         |        |
| RD10-T5                                                                    | excluded | ratio SD/mean > 0.4       | RD10-T6                                                       | included | ratio SD/mean = 0.2       |                  |                |                  |                      |         |        |
| total trained/tested                                                       |          | 12                        | total trained/tested                                          |          | 12                        |                  |                |                  |                      |         |        |
| total included                                                             |          | 7                         | total included                                                |          | 6                         |                  |                |                  |                      |         |        |

**Table S4. Data for contrast-sensitivity test in rd10 mice in control vs disulfiram conditions (corresponds to Figure 4).**

Top: Data and statistical analysis of success rates in rd10 mice during test #1 and test #2, in control and in disulfiram-treated mice (**Fig. 4D,E**). Bottom: data on the inclusion and exclusion of mice in the behavioral paradigm experiment for Figure 4.

| TABLE S5 Figure 5 - Visual Behavior BMS 493 Treatment                   |          |                           |                                                               |      |                      |               |                                  |                            |                     |                  |                  |  |
|-------------------------------------------------------------------------|----------|---------------------------|---------------------------------------------------------------|------|----------------------|---------------|----------------------------------|----------------------------|---------------------|------------------|------------------|--|
| <b>Fig. 5D</b>                                                          |          |                           |                                                               |      |                      |               |                                  |                            |                     |                  |                  |  |
| <b>Success Rate</b>                                                     |          |                           |                                                               |      |                      |               |                                  |                            |                     |                  |                  |  |
| <b>TEST 1</b>                                                           |          |                           | <b>TEST 1</b> *** Before any treatment was given to any mouse |      |                      |               |                                  |                            |                     |                  |                  |  |
| All mice n = 12                                                         |          |                           | Vehicle (n=6)                                                 |      |                      | BMS 493 (n=6) |                                  |                            | Mann-Whitney U Test |                  |                  |  |
| Contrast %                                                              | mean     | sem                       | mean                                                          | sem  | mean                 | sem           | mean                             | sem                        | U value             | P value          |                  |  |
| 8                                                                       | 25.82    | 6.36                      |                                                               |      | 31.37                | 10.96         | 20.27                            | 6.73                       | 11.00               | <b>P = 0.297</b> |                  |  |
| 16                                                                      | 48.02    | 8.44                      |                                                               |      | 51.72                | 13.93         | 44.31                            | 10.67                      | 16.00               | <b>P = 0.818</b> |                  |  |
| 32                                                                      | 70.04    | 6.17                      |                                                               |      | 70.65                | 10.73         | 69.44                            | 7.23                       | 17.00               | <b>P = 0.937</b> |                  |  |
| 64                                                                      | 88.94    | 1.98                      |                                                               |      | 88.27                | 3.42          | 89.61                            | 2.32                       | 18.00               | <b>P = 1.000</b> |                  |  |
| 100                                                                     | 93.70    | 0.68                      |                                                               |      | 92.87                | 1.22          | 94.54                            | 0.54                       | 11.00               | <b>P = 0.310</b> |                  |  |
| <b>Fig. 5E</b>                                                          |          |                           |                                                               |      |                      |               |                                  |                            |                     |                  |                  |  |
| <b>Success Rate</b>                                                     |          |                           |                                                               |      |                      |               |                                  |                            |                     |                  |                  |  |
| <b>TEST 2</b>                                                           |          | Vehicle (n=6)             |                                                               |      | BMS 493 (n=6)        |               |                                  | Mann Whitney Rank Sum Test |                     |                  | T-Test           |  |
| Contrast %                                                              | mean     | sem                       | mean                                                          | sem  | mean                 | sem           | U value                          | P value                    | Normality Test      | t                | P value          |  |
| 8                                                                       | 20.33    | 6.79                      | 20.49                                                         | 4.15 |                      |               | 16.00                            | <b>P = 0.818</b>           |                     |                  |                  |  |
| 16                                                                      | 27.85    | 11.44                     | 24.26                                                         | 5.75 |                      |               | 18.00                            | <b>P = 1.000</b>           |                     |                  |                  |  |
| 32                                                                      | 29.96    | 12.43                     | 28.52                                                         | 7.21 |                      |               | 15.00                            | <b>P = 0.699</b>           |                     |                  |                  |  |
| 64                                                                      | 31.37    | 14.40                     | 59.28                                                         | 9.60 |                      |               | 8.00                             | <b>P = 0.132</b>           | Passed              | 1.612            | <b>P = 0.069</b> |  |
| 100                                                                     | 36.04    | 13.32                     | 76.92                                                         | 6.76 |                      |               | 5.00                             | <b>P = 0.041</b>           | Passed              | 2.736            | <b>P = 0.021</b> |  |
| <b>Inclusion and exclusion of mice in Vehicle / BMS 493 experiments</b> |          |                           |                                                               |      |                      |               |                                  |                            |                     |                  |                  |  |
| Vehicle Mice                                                            | Status   | Reason                    |                                                               |      | BMS 493              | Status        | Reason                           |                            |                     |                  |                  |  |
| RD10-B6-2                                                               | included | ratio SD/mean = 0.2       |                                                               |      | RD10-B6-             | excluded      | ratio SD/mean > 0.4              |                            |                     |                  |                  |  |
| RD10-B6-4                                                               | excluded | ratio SD/mean > 0.4       |                                                               |      | RD10-B6-             | excluded      | <80% success Session 3           |                            |                     |                  |                  |  |
| RD10-B6-6                                                               | included | ratio SD/mean = 0.26      |                                                               |      | RD10-B6-             | excluded      | ratio SD/mean > 0.4              |                            |                     |                  |                  |  |
| RD10-B7-1                                                               | included | ratio SD/mean = 0.12      |                                                               |      | RD10-B7-             | included      | ratio SD/mean = 0.25             |                            |                     |                  |                  |  |
| RD10-B7-3                                                               | excluded | ratio SD/mean > 0.4       |                                                               |      | RD10-B7-             | included      | ratio SD/mean = 0.14             |                            |                     |                  |                  |  |
| RD10-B7-5                                                               | included | ratio SD/mean = 0.2       |                                                               |      | RD10-B7-             | included      | ratio SD/mean = 0.28             |                            |                     |                  |                  |  |
| RD10-B8-2                                                               | included | ratio SD/mean = 0.14      |                                                               |      | RD10-B8-             | included      | ratio SD/mean = 0.35             |                            |                     |                  |                  |  |
| RD10-B8-4                                                               | excluded | did not perform on Test 2 |                                                               |      | RD10-B8-             | included      | ratio SD/mean = 0.32             |                            |                     |                  |                  |  |
| RD10-B8-6                                                               | excluded | ratio SD/mean > 0.4       |                                                               |      | RD10-B8-             | excluded      | did not perform on Test 2        |                            |                     |                  |                  |  |
| RD10-B9-2                                                               | excluded | ratio SD/mean > 0.4       |                                                               |      | RD10-B9-             | included      | ratio SD/mean = 0.2              |                            |                     |                  |                  |  |
| RD10-B9-4                                                               | excluded | <80% success Session 3    |                                                               |      | RD10-B9-             | excluded      | found dead in cage before Test 2 |                            |                     |                  |                  |  |
| RD10-B9-5                                                               | included | ratio SD/mean = 0.3       |                                                               |      | RD10-B9-             | excluded      | ratio SD/mean > 0.4              |                            |                     |                  |                  |  |
| total trained/tested                                                    |          | 12                        |                                                               |      | total trained/tested |               | 12                               |                            |                     |                  |                  |  |
| total included                                                          |          | 6                         |                                                               |      | total included       |               | 6                                |                            |                     |                  |                  |  |

**Table S5. Data for contrast-sensitivity test in rd10 mice in vehicle vs BMS 493 conditions (corresponds to Figure 5).**

Top: Data and statistical analysis of success rates in rd10 mice during test #1 and test #2, in vehicle and in BMS 493-injected mice (**Fig. 5D,E**). Bottom: data on the inclusion and exclusion of mice in the behavioral paradigm experiment for Figure 5.
